# Supplementary material
Source: Springer Nature journal article supplement (https://www.springermedizin.de/resource/supplementary/13024_2011_199_MOESM11_ESM.pdf/9643654)

**A**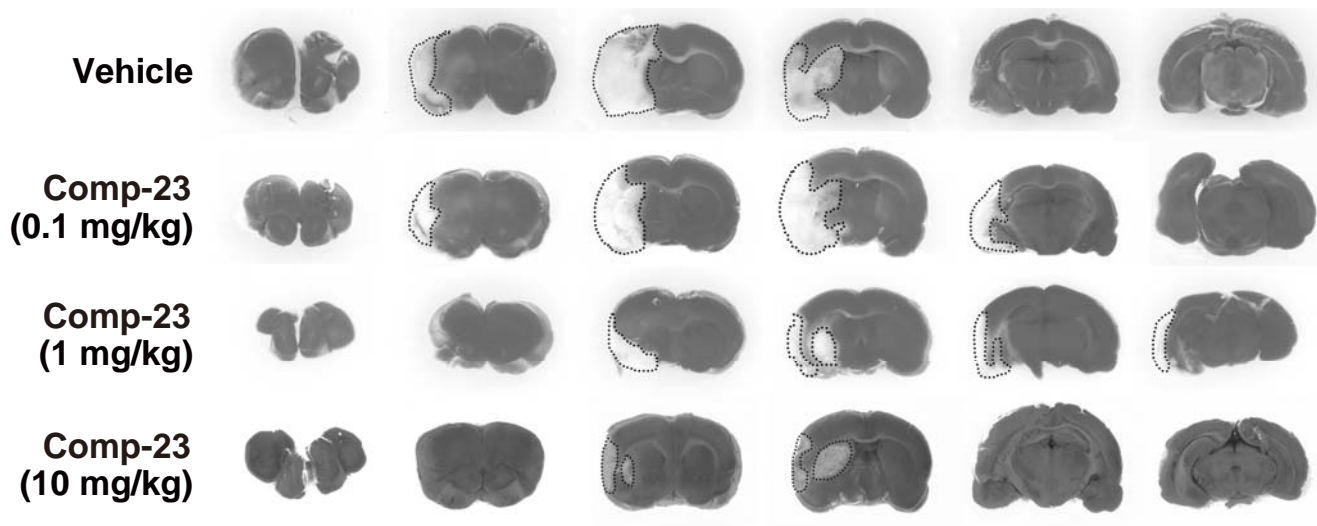**B**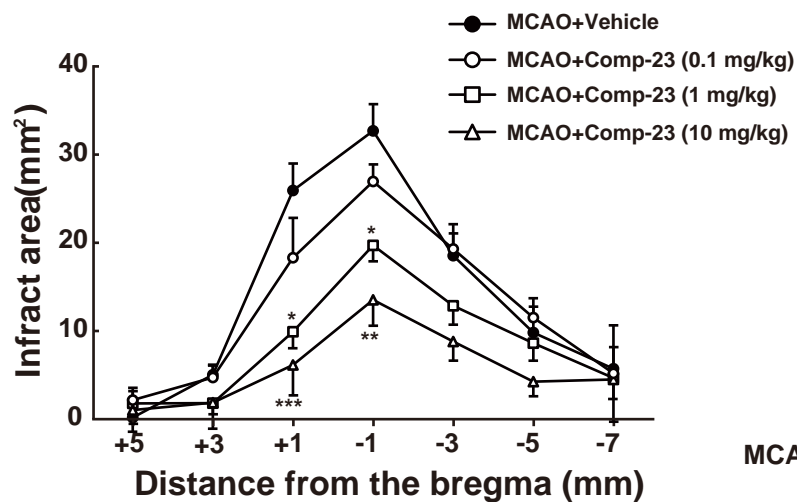**C**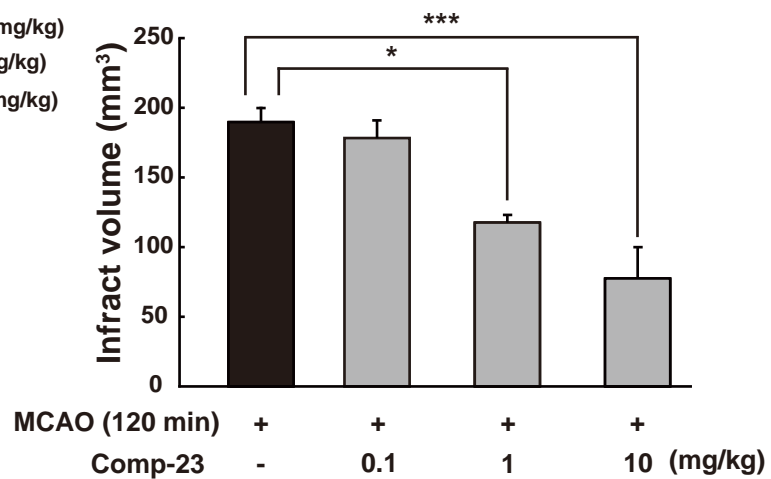

Supplement: MOESM11 [file 9643654]
